# Supplementary material
Source: publisher figshare collection journal article supplement (https://acs.figshare.com/ndownloader/files/34084255)
Supplement: Supplementary file 1 [file 34084255]

# Supporting Information

## Dispersion Stability of Graphene Oxide in Extreme Environment and its Applications in Shale Exploitation

Lan Ma<sup>1,2</sup>, Gang Xie<sup>\*1</sup>, Pingya Luo<sup>\*1</sup>, Liyun Zhang<sup>1, 3</sup>, Fan Yi<sup>4</sup>, Yi He<sup>1, 3</sup>

<sup>1</sup> State Key Lab of Oil and Gas Reservoir Geology and Exploitation, Southwest Petroleum University, 8

Xindu Avenue, Chengdu, Sichuan 610500, China

<sup>2</sup> School of Science, Xihua University, Jinzhou Road, Chengdu, Sichuan 610039, China

<sup>3</sup> College of Chemistry and Chemical Engineering, Southwest Petroleum University, 8 Xindu Avenue,

Chengdu, Sichuan 610500, China

<sup>4</sup> Chengdu Graphene Application Institute of Industrial Technology, Leshan Road, Chengdu, Sichuan 610500, China

**Email address of all authors:** [malan2018@emai.xhu.edu.cn](mailto:malan2018@emai.xhu.edu.cn) (Lan Ma), [201899010129@swpu.edu.cn](mailto:201899010129@swpu.edu.cn) (Gang Xie),

[luopy@swpu.edu.cn](mailto:luopy@swpu.edu.cn) (Pingya Luo), [1042924616@qq.com](mailto:1042924616@qq.com) (Liyun Zhang), [544760078@qq.com](mailto:544760078@qq.com) (Fan Yi),

[heyi@swpu.edu.cn](mailto:heyi@swpu.edu.cn) (Yi He).

**\* Corresponding author. Email address:** [201899010129@swpu.edu.cn](mailto:201899010129@swpu.edu.cn), [luopy@swpu.edu.cn](mailto:luopy@swpu.edu.cn)

### Contents of Supporting Information

Number of Pages: 4

Number of Figures: 3

Number of Tables: 2

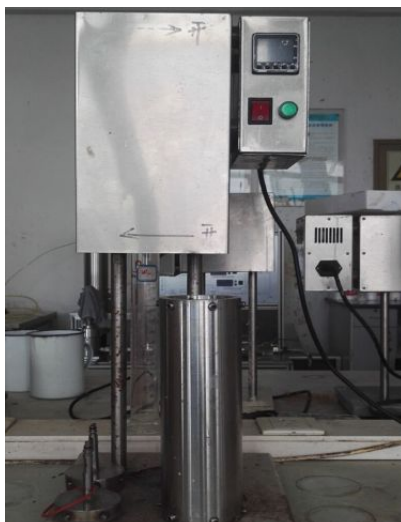

**Figure S1.** High-pressure and high-temperature filter instrument

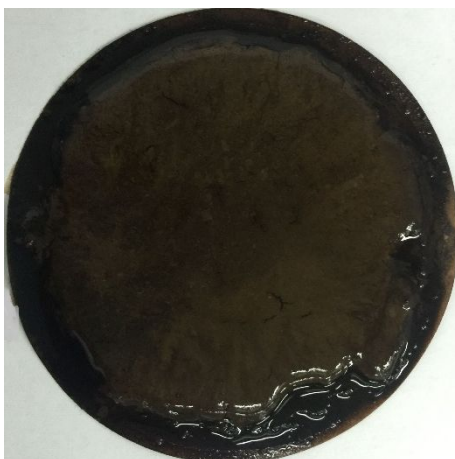

**Figure S2.** The digital photograph of LPFC

### 3 Results and discussion :

**Table S1** The atom composition of various modified graphene oxide

| Sample   | Element | Atom composition (%) |
|----------|---------|----------------------|
| GO       | C 1s    | 30.82                |
|          | O 1s    | 69.18                |
| GO-APTES | C 1s    | 31.71                |
|          | O 1s    | 59.34                |
|          | Si 2p   | 4.26                 |
|          | N 1s    | 4.70                 |
|          | C 1s    | 37.48                |

|             |       |       |
|-------------|-------|-------|
| GO-APTES-Br | O 1s  | 51.12 |
|             | Si 2p | 2.49  |
|             | N 1s  | 4.39  |
|             | Br 3d | 4.57  |
| GO-g-SPMA   | C 1s  | 32.39 |
|             | O 1s  | 48.19 |
|             | Si 2p | 3.27  |
|             | K 2p  | 5.51  |
|             | S 2p  | 5.64  |
|             | N 1s  | 4.47  |
|             | Br 3d | 0.52  |

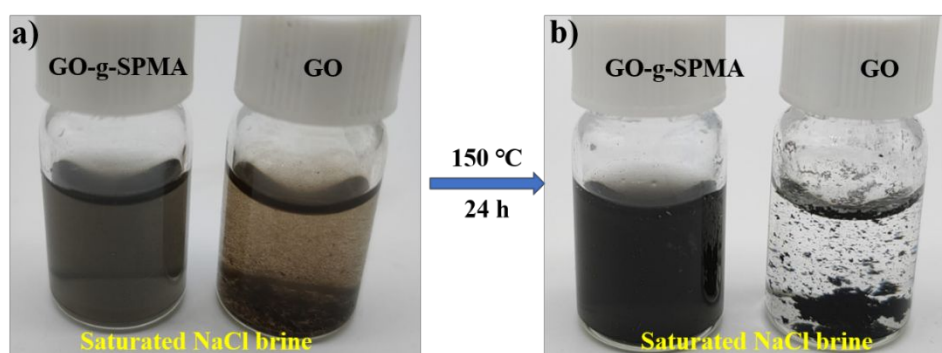

**Figure S3.** The dispersion of GO and GO-g-SPMA preprocessed at high salinity and at high temperature.

The plugging performance of GO and GO-g-SPMA for the artificial core at the temperature of 105 °C and a pressure differential of 3.5 MPa depicted in Table S2. The total of the reverse blocking rate and the reservoir damage recovery rate is 100%. In Table S2, the plugging rate of 0.1 wt% GO-g-SPMA and 0.2 wt% GO-g-SPMA to artificial cores were 77.22% and 79.87% respectively, which were lower than that of 0.1 wt% GO (88.34 %). As for an artificial core, the reservoir damage recovery rate of 0.1 wt% GO-g-SPMA solution was 30.30 %, which was much higher than that of GO. With adding 0.3 wt% of GO-g-SPMA, the blocking rate and the reverse blocking rate of GO-g-SPMA increased to 96.02% and 96.78 %, respectively, whereas the reservoir damage recovery

rate was only 3.22 %. The results indicated that 0.3 wt% GO-g-SPMA had an outstanding plugging performance.

**Table S2** Evaluation of the plugging effect of GO and GO-g-SPMA artificial core at 105 °C

| Substance addition | Blank<br>core<br>permeabil<br>ity /mD | Forward drive<br>permeability<br>/mD | Permeability<br>of reverse<br>drive /mD | Blocki<br>ng rate<br>/% | Reverse<br>blocking<br>rate /% | Reservoir<br>damage<br>recovery<br>rate /% |
|--------------------|---------------------------------------|--------------------------------------|-----------------------------------------|-------------------------|--------------------------------|--------------------------------------------|
| 0.1wt% GO          | $5.72 \times 10^{-2}$                 | $6.67 \times 10^{-3}$                | $1.14 \times 10^{-2}$                   | 88.34                   | 80.07                          | 19.93                                      |
| 0.1wt% GO-g-SPMA   | $8.12 \times 10^{-2}$                 | $8.15 \times 10^{-2}$                | $2.46 \times 10^{-2}$                   | 77.22                   | 69.70                          | 30.30                                      |
| 0.2 wt% GO-g-SPMA  | $7.85 \times 10^{-2}$                 | $1.58 \times 10^{-2}$                | $9.37 \times 10^{-3}$                   | 79.87                   | 88.06                          | 11.94                                      |
| 0.3 wt% GO-g-SPMA  | $9.25 \times 10^{-2}$                 | $3.68 \times 10^{-3}$                | $2.98 \times 10^{-3}$                   | 96.02                   | 96.78                          | 3.22                                       |
